# Supplementary material for: Role competency scale on shared decision-making nurses: Development and psychometric properties
Source: PubMed Central journal article supplement — SAGE Open Med. 2018 Oct 17;6:2050312118807614. doi: 10.1177/2050312118807614 (PMC6195012; doi:10.1177/2050312118807614), 2018-10-17
Supplement: Appendix_A.pdf [file Appendix_A.pdf]

## Appendix A

### The 20-item Role Competency Scale on Shared Decision Making-Nurses (SDM-N)

For each of the questions below, circle the response that honestly characterizes how you feel about the statement, where: 1 = Strongly Disagree, 2 = Disagree, 3 = Undecided, 4 = Agree, 5 = Strongly Agree.

#### Knowledge Subscale (4 items)

|                                                                                                                            | Strongly Disagree | Disagree | Undecided | Agree | Strongly Agree |
|----------------------------------------------------------------------------------------------------------------------------|-------------------|----------|-----------|-------|----------------|
| I understand my role in participating in the shared decision-making process.                                               | 1                 | 2        | 3         | 4     | 5              |
| I know that an explicit, mutually agreed treatment decision between the clinician and patient is the ultimate goal of SDM. | 1                 | 2        | 3         | 4     | 5              |
| I recognize that a deliberation time is required for a successful shared decision making process.                          | 1                 | 2        | 3         | 4     | 5              |
| I am aware that shared decision-making process involves weighing risks and benefits.                                       | 1                 | 2        | 3         | 4     | 5              |

#### Attitudes Subscale (8 items)

|                                                                                                | Strongly Disagree | Disagree | Undecided | Agree | Strongly Agree |
|------------------------------------------------------------------------------------------------|-------------------|----------|-----------|-------|----------------|
| I have enough time to participate in shared decision making.                                   | 1                 | 2        | 3         | 4     | 5              |
| Shared decision making is essential in contemporary oncology nursing practice.                 | 1                 | 2        | 3         | 4     | 5              |
| I certainly feel comfortable actively participating during the shared decision-making process. | 1                 | 2        | 3         | 4     | 5              |
| I play crucial roles that optimize patient outcomes related to treatment decisions.            | 1                 | 2        | 3         | 4     | 5              |
| The patient is the focus throughout the shared                                                 | 1                 | 2        | 3         | 4     | 5              |

decision-making process.

|                                                                                             |   |   |   |   |   |
|---------------------------------------------------------------------------------------------|---|---|---|---|---|
| Patients rely on more than just the physician to help them with cancer treatment decisions. | 1 | 2 | 3 | 4 | 5 |
|---------------------------------------------------------------------------------------------|---|---|---|---|---|

|                                                                                                                       |   |   |   |   |   |
|-----------------------------------------------------------------------------------------------------------------------|---|---|---|---|---|
| My opinion is valued by patients and the medical team throughout the cancer treatment shared decision-making process. | 1 | 2 | 3 | 4 | 5 |
|-----------------------------------------------------------------------------------------------------------------------|---|---|---|---|---|

|                                                                                   |   |   |   |   |   |
|-----------------------------------------------------------------------------------|---|---|---|---|---|
| My roles in cancer treatment decision-making process are complex, but manageable. | 1 | 2 | 3 | 4 | 5 |
|-----------------------------------------------------------------------------------|---|---|---|---|---|

---

**Communication Skills Subscale (4 items)**

|                                                                                                          | <b>Strongly Disagree</b> | <b>Disagree</b> | <b>Undecided</b> | <b>Agree</b> | <b>Strongly Agree</b> |
|----------------------------------------------------------------------------------------------------------|--------------------------|-----------------|------------------|--------------|-----------------------|
| I provide patient education on diseases and their treatments.                                            | 1                        | 2               | 3                | 4            | 5                     |
| I have the ability to share significant patient information to multidisciplinary team members.           | 1                        | 2               | 3                | 4            | 5                     |
| I have the skills to assess for the side effects of cancer treatment.                                    | 1                        | 2               | 3                | 4            | 5                     |
| I advocate on behalf of my patient during the cancer treatment shared decision-making process if needed. | 1                        | 2               | 3                | 4            | 5                     |

**Adaptability Subscale**

(4 items)

|                                                                                                                  | <b>Strongly Disagree</b> | <b>Disagree</b> | <b>Undecided</b> | <b>Agree</b> | <b>Strongly agree</b> |
|------------------------------------------------------------------------------------------------------------------|--------------------------|-----------------|------------------|--------------|-----------------------|
| I have the skills to adjust my decision-making role contingent on multiple variables in the face of uncertainty. | 1                        | 2               | 3                | 4            | 5                     |
| I can evaluate the outcomes of cancer treatment SDM.                                                             | 1                        | 2               | 3                | 4            | 5                     |

I regularly assess patient values and preferences about shared decision making.      1                      2                      3                      4                      5

I assess the patient's expectations of participating in the shared decision making process.      1                      2                      3                      4                      5

## Appendix B

### Sociodemographic Scale

A) You are a:

1. Registered Nurse
2. Nurse Clinician
3. Clinical Nurse Specialist

B) What gender are you?

1. Male
2. Female

C) What is your age group?

1. 20-29
2. 30-39
3. 40-49
4. 50-59
5. 60 and above

D) What is your working status?

1. Full time
2. Part time
3. Per Diem

E) For how many years have you been in practice?

1. 1-5 years
2. 6-10 years
3. 11-15 years
4. 16-20 years
5. >21 years

F) What is your highest educational level attained?

1. Associate degree

2. Bachelor's degree

3. Master's degree

4. Doctoral degree

G) What is your ethnicity?

1. Caucasians

2. Blacks

3. Hispanics

4. Asian

5. Mixed
